# Supplementary material for: WITHDRAWN: 6-Gingerol ameliorates myocardial injury and lipid accumulation in diabetic mice: Associating with modulating ACSL3/ACSL4 expression and AMPK/Nrf2/SLC7A11 pathway activation to inhibit ferroptosis
Source: Research Square preprint supplement (doi:10.21203/rs.3.rs-6388897/v1), 2025-04-25
Supplement: Supplementary file 1 [file 30a91ae014910fd5c818f3d5.docx]

Figure S1. Food intake of each group.


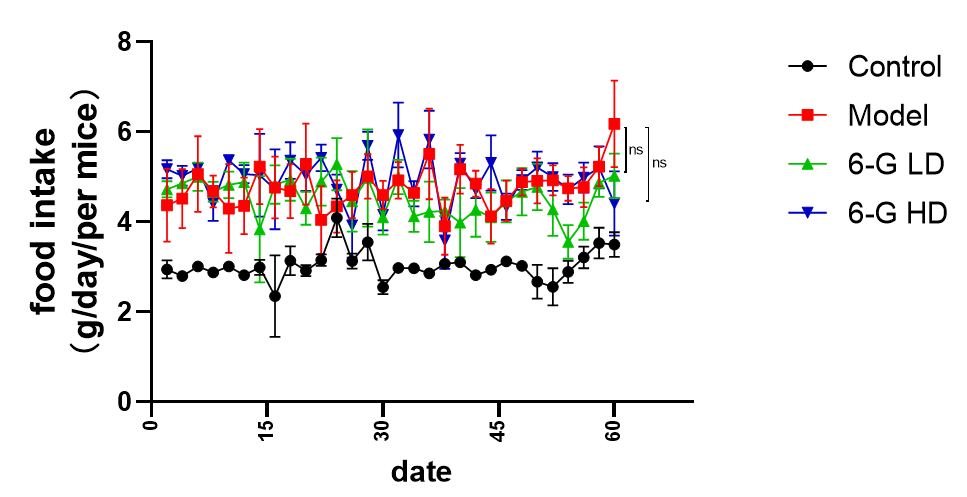


The data are presented as the means ± SEMs. ns *p* > 0.05 compare to model group.
